# Supplementary material for: Polysaccharides from the seeds of Gleditsia sinensis Lam. attenuate DSS-induced colitis in mice via improving gut barrier homeostasis and alleviating gut microbiota dybiosis
Source: Royal Society of Chemistry journal article supplement (doi:10.1039/d2fo02722d), 2022-12-13
Supplement: d2fo02722d1.pdf [file d2fo02722d1.pdf]

## Supplementary materials

### Polysaccharides from seeds of *Gleditsia sinensis* Lam. attenuate colonic inflammation in DSS-induced mice via improving gut barrier homeostasis and alleviating gut microbiota dybiosis

Ningbo Qin<sup>1,\*,#</sup>, Hongxu Liu<sup>1,#</sup>, Yu Cao<sup>1</sup>, Zhen Wang<sup>1</sup>, Xiaomeng Ren<sup>1</sup>, Xiaodong Xia<sup>1</sup>

<sup>1</sup> National Engineering Research Center of Seafood, School of Food Science and Technology, Dalian Polytechnic University, Dalian, Liaoning 116034, China

\*Corresponding author. Dalian Polytechnic University, 1 Qinggongyuan Road, Dalian, Liaoning, 116034, China. E-mail: [qinningbo6902765@163.com](mailto:qinningbo6902765@163.com)

# These two authors contributed equally to this work.

**Table S1. Primer sequence used for RT-qPCR experiments**

| Genes                          | Gene ID | Forward primer           | Reverse primer          |
|--------------------------------|---------|--------------------------|-------------------------|
| <i>Muc2</i>                    | 17831   | TCATGACGTCTGGTGAATGG     | AGCTTGTCGTGGCAGCTTGA    |
| <i>Occludin</i>                | 18260   | GGCAAGCGATCATACCAGAG     | AGGCTGCCTGAAGTCATCCAC   |
| <i>Claudin-1</i>               | 12737   | AGTGCATGAGGTGCCTGGAAG    | TGGCCACTAATGTCGCCAGA    |
| <i>ZO-1</i>                    | 21872   | GACCAATAGCTGATGTTGCCAGAG | TATGAAGGCGAATGATGCCAGA  |
| <i>Tff3</i>                    | 21786   | TGCTGCCATGGAGACCAGAG     | GACATTTGCCGGCACCATAC    |
| <i>IL-6</i>                    | 16193   | CTCAGCGCTGAGTTG          | CCTGTAGCCCACGTCGTAGC    |
| <i>IL-1<math>\beta</math></i>  | 16176   | GAGCACCTTCTTTTCCTTCATCTT | TCACACACCAGCAGGTTATCATC |
| <i>TNF-<math>\alpha</math></i> | 21926   | ACTGAACTTCGGGGTGATCG     | GGCTACAGGCTTGCTCACTCG   |
| <i>GAPDH</i>                   | 14433   | TGTGTCCGTCGTGGATCTGA     | TTGCTGTTGAAGTCGCAGGAG   |

**Table S2. List of antibodies**

| Name of Antibody     | Catalog number | Concentration | Company           |
|----------------------|----------------|---------------|-------------------|
| <i>Muc2</i>          | 27675-1-AP     | IF: 1:1000    | Proteintech Group |
| <i>ZO-1</i>          | Ab221547       | IF: 1:100     | Abcam             |
| Goat Anti-Rabbit IgG | Ab150077       | IF: 1:400     | Abcam             |

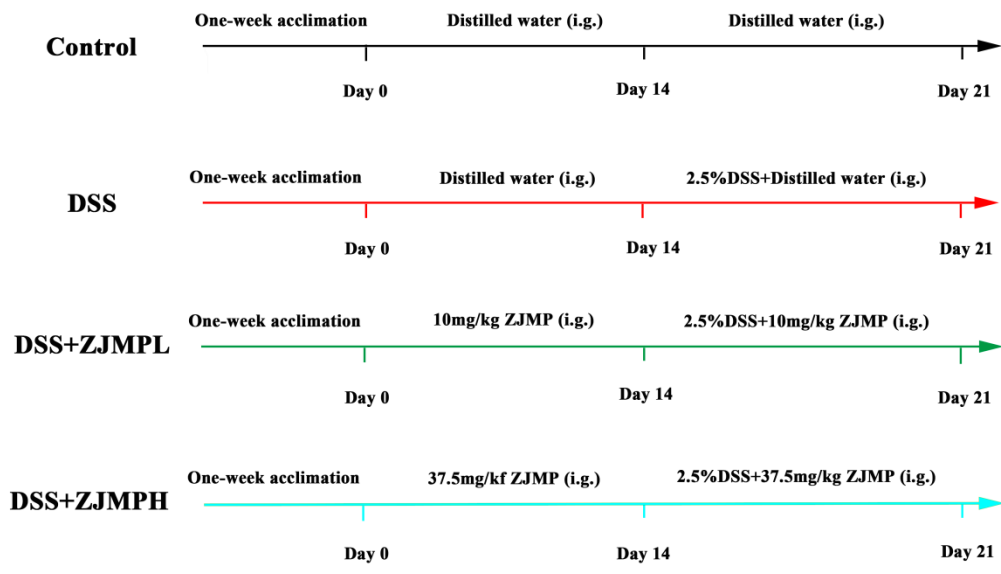

**Figure S1.** Study design for the whole experiment.

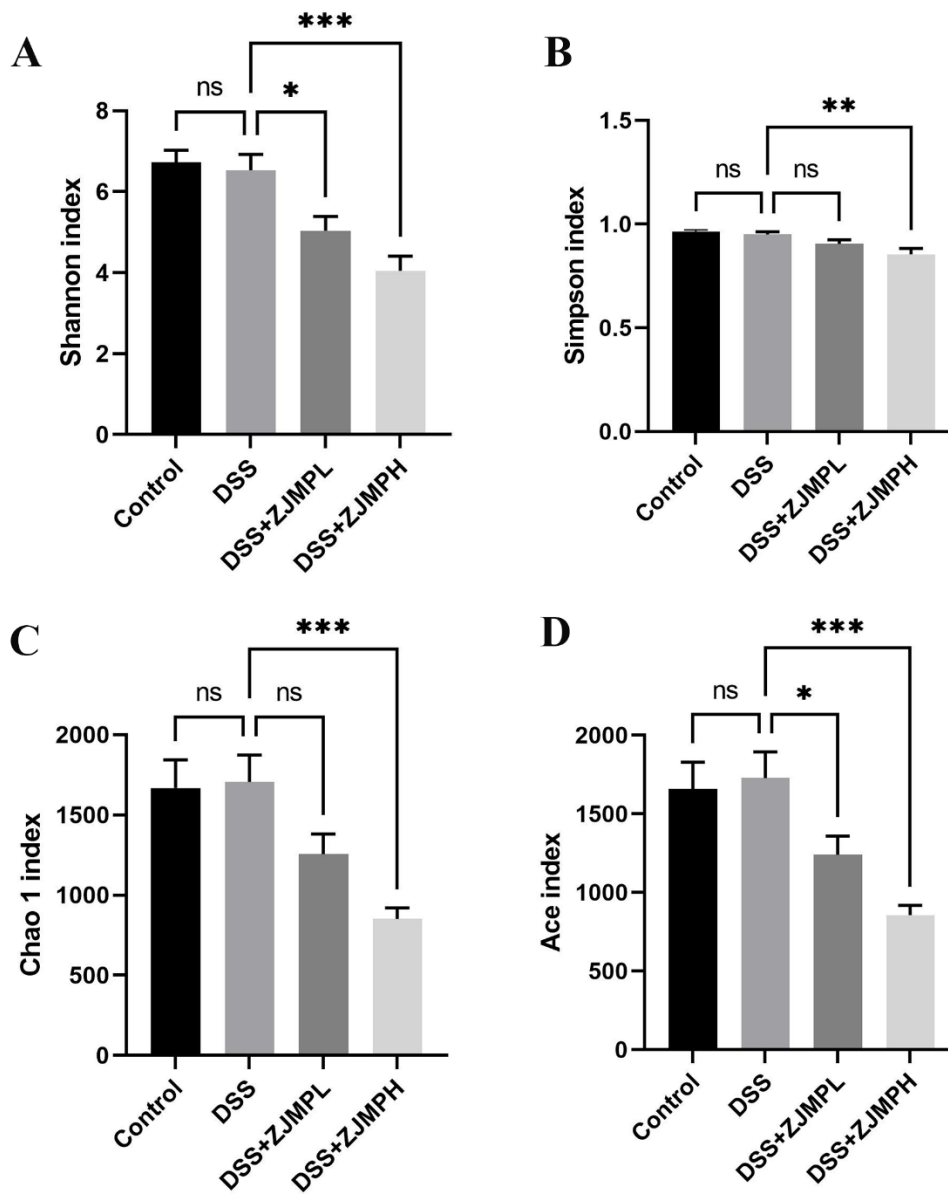

**Figure S2.** The impact of ZJMP on alpha diversity of fecal bacteria in different groups. (A) Shannon, (B) Simpson, (C) Chao 1, (D) Ace. All data are presented as mean  $\pm$  SEM, \* $p < 0.5$ , \*\* $p < 0.01$ , \*\*\* $p < 0.001$  vs. DSS group.

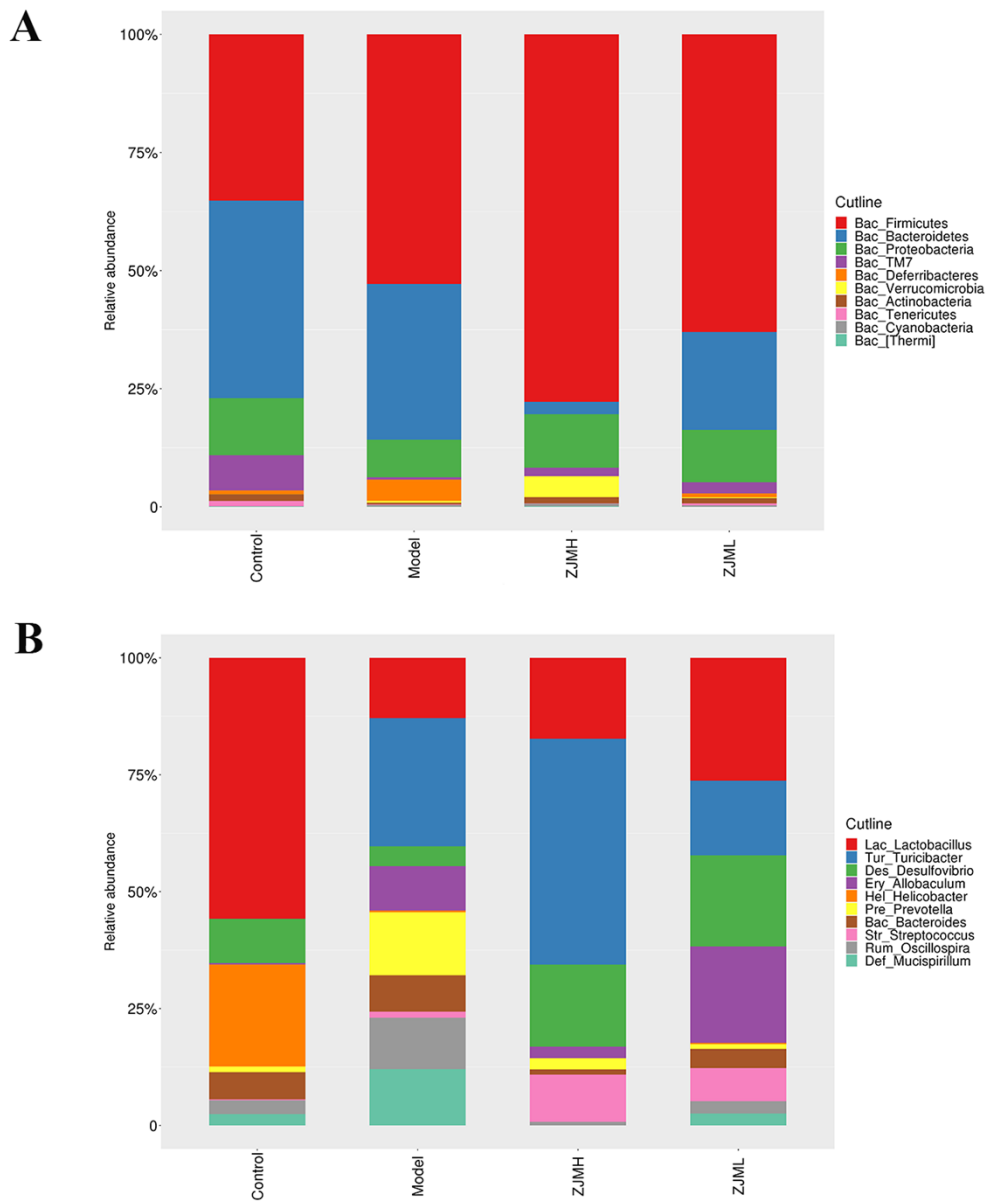

**Figure S3.** The impact of ZJMP on composition of gut microbiota. (A) Relative abundance at phylum level, (B) Relative abundance at genus level.
